# Supplementary material
Source: Springer Nature journal article supplement (https://www.springermedizin.de/resource/supplementary/12883_2010_427_MOESM3_ESM.pdf/9455422)

11:16:39  
rad: 14.0 cm  
0 kHz

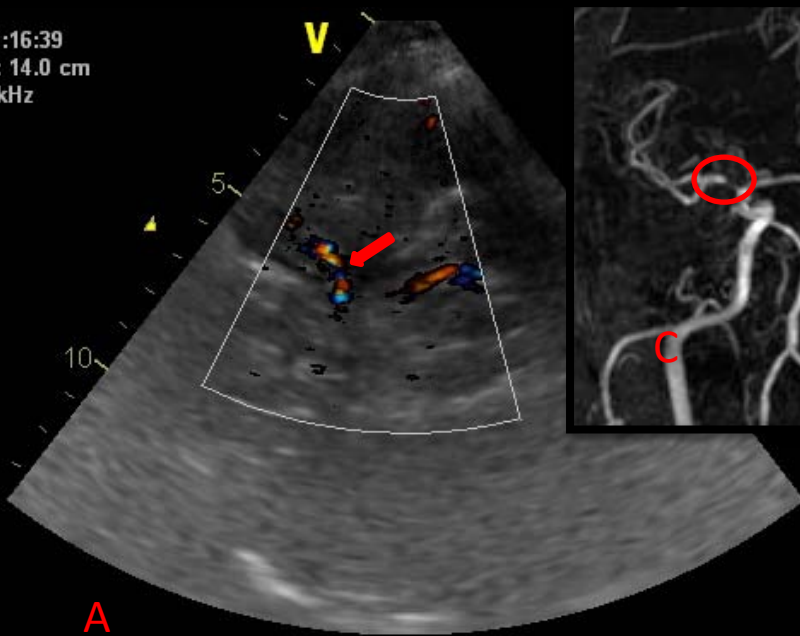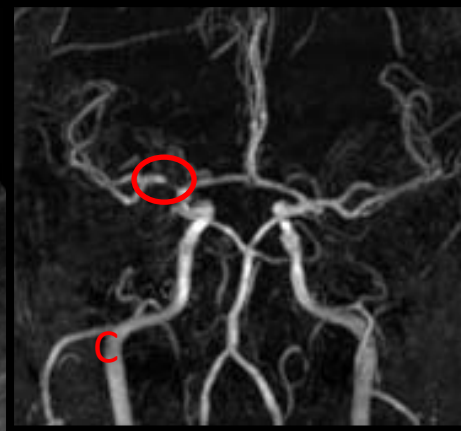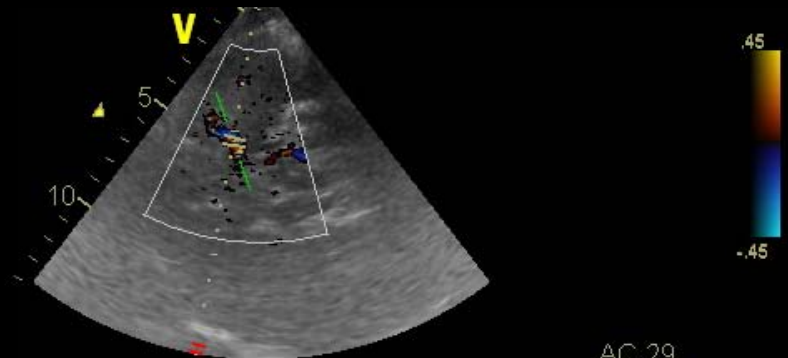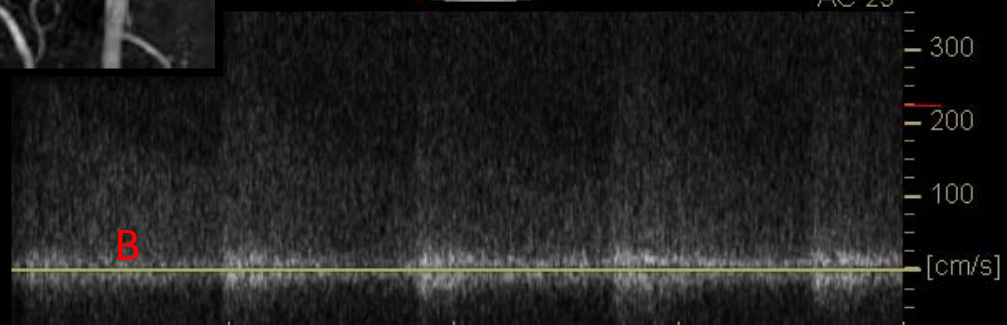

Supplement: MOESM3 [file 9455422]
